# Supplementary material
Source: MDPI journal article supplement (https://www.mdpi.com/2076-3417/11/21/10495)

## Supplementary figure 1

### Day 1 (Transferred matrigel)

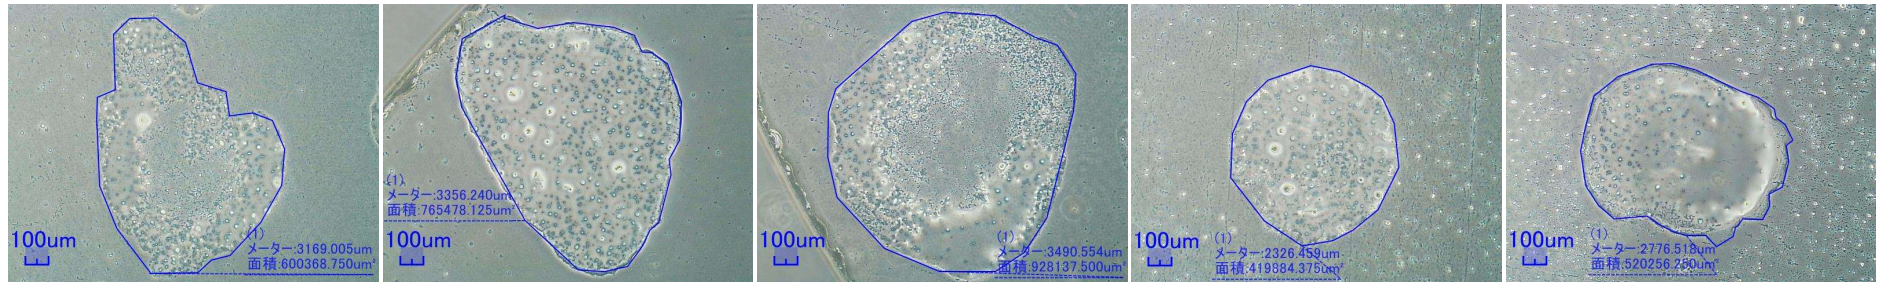

### Day 7 (Cell pattern)

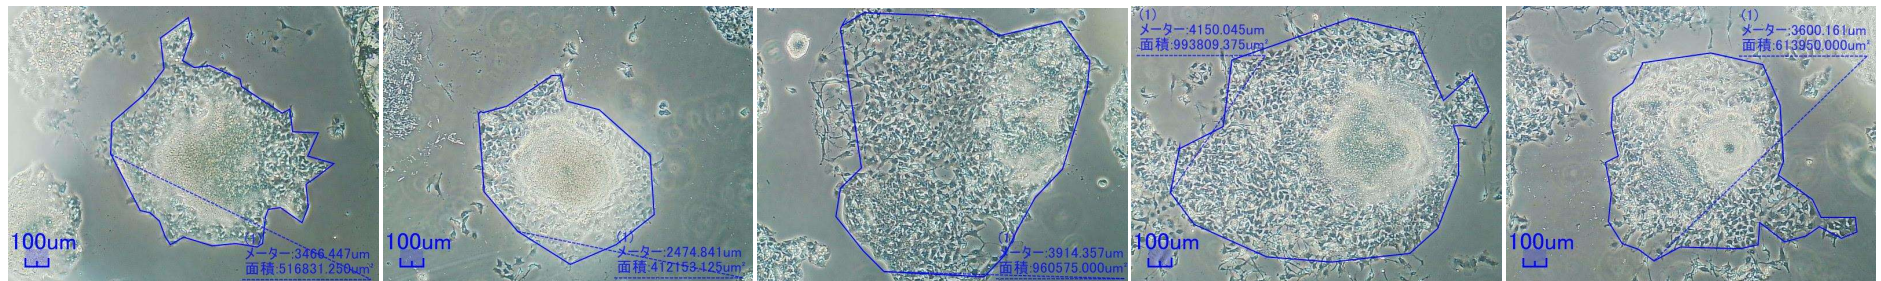



# Supplementary figure 1

## Day 14 (Spheroid)

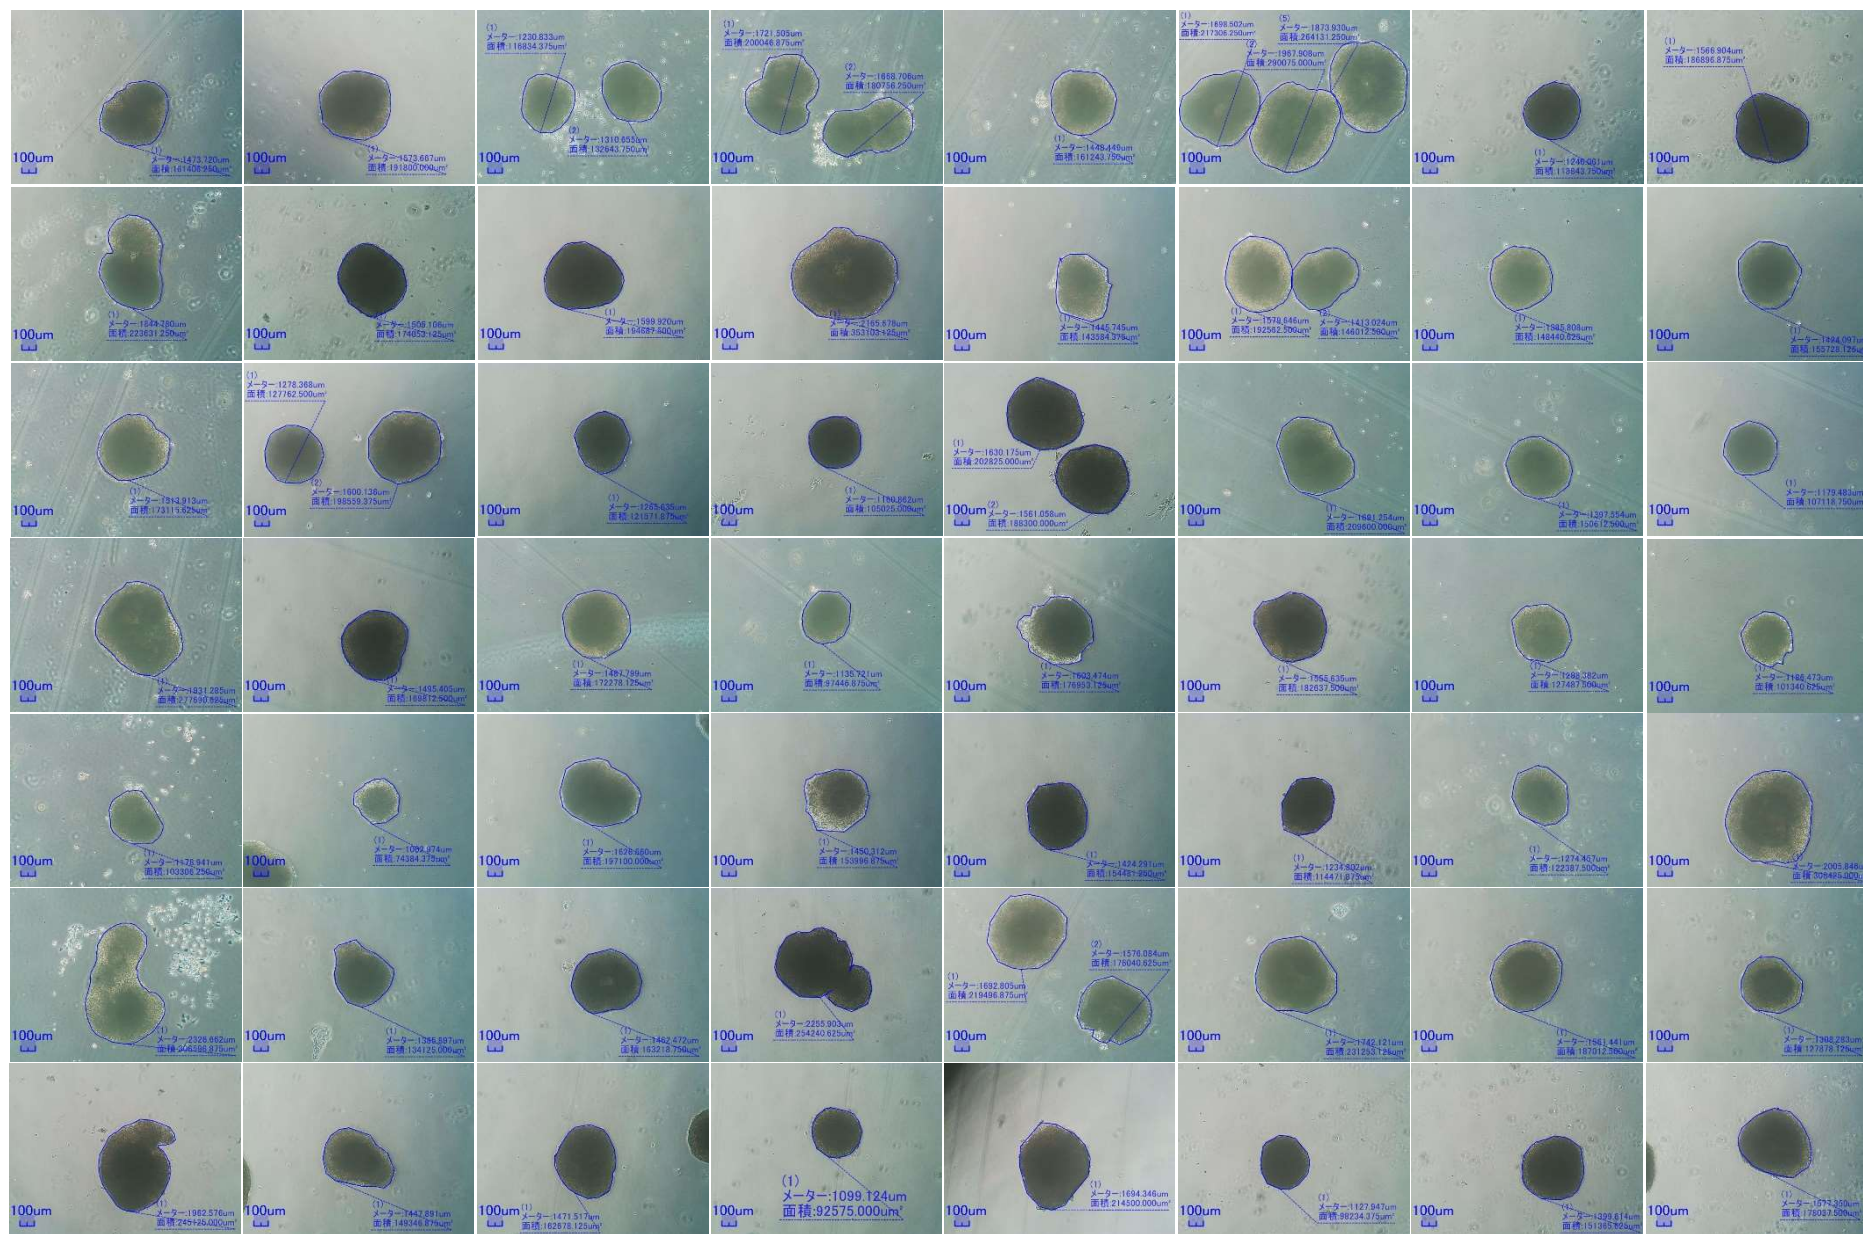

Supplement: s1 [file s1]
